# Supplementary material for: Impact of mental disorders during education on work participation: a register-based longitudinal study on young adults with 10 years follow-up
Source: HighWire-hosted journal article supplement (doi:10.1136/jech-2022-219487), 2023-05-17
Supplement: jech-2022-219487supp001_data_supplement.pdf [file jech-2022-219487supp001_data_supplement.pdf]

## SUPPLEMENTARY FILE

Table S1. Associations of using at least one medication for mental disorders with entering paid employment among secondary vocational education (N = 1 004 395) and higher education graduates (N = 1 341 998), and with exiting paid employment among secondary vocational education (N = 866 545) and higher education graduates (N = 969 885) who entered paid employment, stratified by sex and migration background.

| Secondary vocational education |                                        |                                                   |                                                              |                                                  |
|--------------------------------|----------------------------------------|---------------------------------------------------|--------------------------------------------------------------|--------------------------------------------------|
|                                | Among all graduates<br>(N = 1 004 395) |                                                   | Among graduates who entered paid employment<br>(N = 866 545) |                                                  |
|                                | Prevalence of medication<br>N (%)      | Enter paid employment<br>HR (95% CI) <sup>1</sup> | Prevalence of medication<br>N (%)                            | Exit paid employment<br>HR (95% CI) <sup>1</sup> |
| Sex                            |                                        |                                                   |                                                              |                                                  |
| - Female                       | 26 046 (5.5)                           | 0.72 (0.71-0.73)                                  | 20 676 (5.1)                                                 | 1.32 (1.29-1.35)                                 |
| - Male                         | 26 261 (5.0)                           | 0.70 (0.69-0.71)                                  | 21 503 (4.6)                                                 | 1.51 (1.47-1.55)                                 |
| - Transgender                  | 86 (13.5)                              | 0.76 (0.57-0.998)                                 | 60 (12.8)                                                    | 1.11 (0.72-1.71)                                 |
| Migration background           |                                        |                                                   |                                                              |                                                  |
| - Native Dutch                 | 43 484 (5.9)                           | 0.71 (0.70-0.71)                                  | 35 837 (5.4)                                                 | 1.49 (1.46-1.52)                                 |
| - Moroccan                     | 1 017 (2.6)                            | 0.60 (0.56-0.65)                                  | 677 (2.2)                                                    | 1.27 (1.15-1.41)                                 |
| - Turkish                      | 1 180 (2.6)                            | 0.69 (0.64-0.73)                                  | 878 (2.5)                                                    | 1.22 (1.11-1.35)                                 |
| - Antillean                    | 1 581 (3.3)                            | 0.69 (0.65-0.74)                                  | 1 083 (2.8)                                                  | 1.14 (1.05-1.25)                                 |
| - Other European               | 1 385 (5.4)                            | 0.72 (0.68-0.76)                                  | 1 079 (5.0)                                                  | 1.38 (1.25-1.51)                                 |
| - Other non-European           | 3 746 (3.6)                            | 0.78 (0.75-0.81)                                  | 2 685 (3.5)                                                  | 1.13 (1.07-1.20)                                 |
| Higher education               |                                        |                                                   |                                                              |                                                  |
|                                | Among all graduates<br>(N = 1 341 998) |                                                   | Among graduates who entered paid employment<br>(N = 969 885) |                                                  |
|                                | Prevalence of medication<br>N (%)      | Enter paid employment<br>HR (95% CI) <sup>1</sup> | Prevalence of medication<br>N (%)                            | Exit paid employment<br>HR (95% CI) <sup>1</sup> |
| Sex                            |                                        |                                                   |                                                              |                                                  |
| - Female                       | 31 473 (4.3)                           | 0.70 (0.69-0.71)                                  | 22 435 (4.2)                                                 | 1.38 (1.35-1.42)                                 |
| - Male                         | 21 214 (3.5)                           | 0.67 (0.66-0.68)                                  | 14 412 (3.3)                                                 | 1.45 (1.40-1.49)                                 |
| - Transgender                  | 96 (15.6)                              | 0.70 (0.51-0.95)                                  | 49 (14.6)                                                    | 1.30 (0.78-2.16)                                 |
| Migration background           |                                        |                                                   |                                                              |                                                  |
| - Native Dutch                 | 43 206 (4.4)                           | 0.65 (0.64-0.66)                                  | 30 455 (4.0)                                                 | 1.45 (1.42-1.48)                                 |
| - Moroccan                     | 688 (3.0)                              | 0.59 (0.54-0.64)                                  | 490 (2.7)                                                    | 1.30 (1.12-1.51)                                 |
| - Turkish                      | 843 (3.3)                              | 0.71 (0.66-0.78)                                  | 593 (3.1)                                                    | 1.37 (1.20-1.57)                                 |
| - Antillean                    | 1 294 (3.4)                            | 0.71 (0.67-0.76)                                  | 890 (3.0)                                                    | 1.18 (1.05-1.32)                                 |
| - Other European               | 1 812 (4.4)                            | 0.78 (0.73-0.82)                                  | 1 203 (4.3)                                                  | 1.26 (1.14-1.39)                                 |
| - Other non-European           | 4 940 (2.2)                            | 1.13 (1.09-1.17)                                  | 3 265 (2.8)                                                  | 1.28 (1.20-1.35)                                 |

<sup>1</sup> Adjusted for sociodemographics (age at graduation, sex, migration background)

Table S2. Associations of medication use for mental disorders with entering paid employment among all secondary vocational education graduates (N = 1 004 395), and with exiting paid employment among secondary vocational education graduates (N = 866 545) who entered to paid employment, stratified by sex and migration background.

|                             | Secondary vocational education         |                                                            |                                                                 |                                                            |                                        |                                                            |                                                                 |                                                            |
|-----------------------------|----------------------------------------|------------------------------------------------------------|-----------------------------------------------------------------|------------------------------------------------------------|----------------------------------------|------------------------------------------------------------|-----------------------------------------------------------------|------------------------------------------------------------|
|                             | Antipsychotics                         |                                                            |                                                                 |                                                            | Anxiolytics                            |                                                            |                                                                 |                                                            |
|                             | Among all graduates<br>(N = 1 004 395) |                                                            | Among graduates who entered<br>paid employment<br>(N = 866 545) |                                                            | Among all graduates<br>(N = 1 004 395) |                                                            | Among graduates who entered<br>paid employment<br>(N = 866 545) |                                                            |
|                             | Prevalence<br>N (%)                    | Entrance to paid<br>employment<br>HR (95% CI) <sup>1</sup> | Prevalence<br>N (%)                                             | Exit from paid<br>employment<br>HR (95% CI) <sup>1</sup>   | Prevalence<br>N (%)                    | Entrance to paid<br>employment<br>HR (95% CI) <sup>1</sup> | Prevalence<br>N (%)                                             | Exit from paid<br>employment<br>HR (95% CI) <sup>1</sup>   |
| <b>Sex</b>                  |                                        |                                                            |                                                                 |                                                            |                                        |                                                            |                                                                 |                                                            |
| - Female                    | 3 196 (0.7)                            | 0.44 (0.42-0.46)                                           | 1 996 (0.5)                                                     | 1.78 (1.66-1.90)                                           | 3 262 (0.7)                            | 0.69 (0.66-0.71)                                           | 2 530 (0.6)                                                     | 1.36 (1.27-1.44)                                           |
| - Male                      | 4 592 (0.9)                            | 0.44 (0.43-0.46)                                           | 3 250 (0.7)                                                     | 1.99 (1.88-2.09)                                           | 1 789 (0.3)                            | 0.56 (0.53-0.59)                                           | 1 387 (0.3)                                                     | 1.52 (1.39-1.65)                                           |
| - Transgender               | 20 (3.1)                               | 0.40 (0.22-0.76)                                           | 10 (2.1)                                                        | 2.00 (0.82-4.94)                                           | x                                      | 1.37 (0.57-3.32)                                           | x                                                               | 2.24 (0.71-7.05)                                           |
| <b>Migration background</b> |                                        |                                                            |                                                                 |                                                            |                                        |                                                            |                                                                 |                                                            |
| - Native Dutch              | 6 090 (0.8)                            | 0.46 (0.44-0.47)                                           | 4 265 (0.6)                                                     | 2.08 (1.99-2.18)                                           | 3 634 (0.5)                            | 0.62 (0.60-0.64)                                           | 2 909 (0.4)                                                     | 1.55 (1.46-1.65)                                           |
| - Moroccan                  | 178 (0.5)                              | 0.40 (0.33-0.49)                                           | 99 (0.3)                                                        | 1.40 (1.07-1.85)                                           | 211 (0.5)                              | 0.65 (0.55-0.76)                                           | 144 (0.5)                                                       | 1.27 (1.01-1.58)                                           |
| - Turkish                   | 171 (0.4)                              | 0.40 (0.33-0.48)                                           | 104 (0.3)                                                       | 1.66 (1.29-2.14)                                           | 247 (0.6)                              | 0.79 (0.68-0.91)                                           | 192 (0.5)                                                       | 1.31 (1.08-1.59)                                           |
| - Antillean                 | 360 (0.7)                              | 0.36 (0.31-0.42)                                           | 187 (0.5)                                                       | 1.37 (1.13-1.68)                                           | 287 (0.6)                              | 0.72 (0.63-0.82)                                           | 205 (0.5)                                                       | 1.07 (0.88-1.30)                                           |
| - Other European            | 240 (0.9)                              | 0.45 (0.39-0.53)                                           | 157 (0.7)                                                       | 1.69 (1.35-2.12)                                           | 143 (0.6)                              | 0.62 (0.52-0.75)                                           | 107 (0.5)                                                       | 1.51 (1.14-2.00)                                           |
| - Other non-European        | 769 (0.7)                              | 0.48 (0.44-0.53)                                           | 444 (0.6)                                                       | 1.42 (1.24-1.63)                                           | 535 (0.5)                              | 0.70 (0.63-0.78)                                           | 265 (0.5)                                                       | 1.10 (0.94-1.28)                                           |
|                             | Hypnotics & sedatives                  |                                                            |                                                                 |                                                            | Antidepressants                        |                                                            |                                                                 |                                                            |
|                             | Among all graduates<br>(N = 1 004 395) |                                                            | Among graduates who entered<br>paid employment<br>(N = 866 545) |                                                            | Among all graduates<br>(N = 1 004 395) |                                                            | Among graduates who entered<br>paid employment<br>(N = 866 545) |                                                            |
|                             | Prevalence<br>N (%)                    | Entrance to paid<br>employment<br>HR (95% CI) <sup>1</sup> | Prevalence<br>N (%)                                             | Entrance to paid<br>employment<br>HR (95% CI) <sup>1</sup> | Prevalence<br>N (%)                    | Entrance to paid<br>employment<br>HR (95% CI) <sup>1</sup> | Prevalence<br>N (%)                                             | Entrance to paid<br>employment<br>HR (95% CI) <sup>1</sup> |
| <b>Sex</b>                  |                                        |                                                            |                                                                 |                                                            |                                        |                                                            |                                                                 |                                                            |
| - Female                    | 1 346 (0.3)                            | 0.57 (0.53-0.60)                                           | 942 (0.2)                                                       | 1.41 (1.27-1.57)                                           | 14 345 (3.0)                           | 0.73 (0.72-0.74)                                           | 11 729 (2.9)                                                    | 1.35 (1.31-1.39)                                           |
| - Male                      | 840 (0.2)                              | 0.53 (0.49-0.58)                                           | 619 (0.1)                                                       | 1.91 (1.68-2.17)                                           | 6 106 (1.2)                            | 0.65 (0.63-0.67)                                           | 5 041 (1.1)                                                     | 1.64 (1.57-1.72)                                           |
| - Transgender               | x                                      | 1.45 (0.53-3.96)                                           | x                                                               | -                                                          | 47 (7.4)                               | 0.78 (0.54-1.12)                                           | 33 (7.1)                                                        | 1.07 (0.59-1.94)                                           |
| <b>Migration background</b> |                                        |                                                            |                                                                 |                                                            |                                        |                                                            |                                                                 |                                                            |
| - Native Dutch              | 1 534 (0.2)                            | 0.53 (0.50-0.57)                                           | 1 130 (0.2)                                                     | 1.80 (1.63-1.98)                                           | 16 628 (2.2)                           | 0.70 (0.69-0.71)                                           | 13 952 (2.1)                                                    | 1.50 (1.45-1.54)                                           |
| - Moroccan                  | 99 (0.3)                               | 0.52 (0.40-0.66)                                           | 63 (0.2)                                                        | 1.26 (0.89-1.78)                                           | 437 (1.1)                              | 0.60 (0.54-0.67)                                           | 314 (1.0)                                                       | 1.39 (1.19-1.61)                                           |
| - Turkish                   | 88 (0.2)                               | 0.72 (0.56-0.92)                                           | 64 (0.2)                                                        | 0.81 (0.53-1.23)                                           | 597 (1.3)                              | 0.67 (0.61-0.74)                                           | 454 (1.3)                                                       | 1.23 (1.08-1.40)                                           |
| - Antillean                 | 135 (0.3)                              | 0.54 (0.44-0.67)                                           | 85 (0.2)                                                        | 1.17 (0.86-1.60)                                           | 544 (1.1)                              | 0.72 (0.65-0.79)                                           | 384 (1.0)                                                       | 1.15 (0.99-1.33)                                           |
| - Other European            | 55 (0.2)                               | 0.50 (0.36-0.69)                                           | 35 (0.2)                                                        | 1.36 (0.80-2.29)                                           | 564 (2.2)                              | 0.72 (0.65-0.79)                                           | 447 (2.1)                                                       | 1.33 (1.15-1.54)                                           |
| - Other non-European        | 280 (0.3)                              | 0.68 (0.59-0.78)                                           | 188 (0.2)                                                       | 1.48 (1.20-1.83)                                           | 1 728 (1.7)                            | 0.76 (0.72-0.80)                                           | 1 252 (1.6)                                                     | 1.19 (1.09-1.29)                                           |
|                             | Psychostimulants                       |                                                            |                                                                 |                                                            | Drugs for addiction                    |                                                            |                                                                 |                                                            |
|                             | Among all graduates<br>(N = 1 004 395) |                                                            | Among graduates who entered<br>paid employment<br>(N = 866 545) |                                                            | Among all graduates<br>(N = 1 004 395) |                                                            | Among graduates who entered<br>paid employment<br>(N = 866 545) |                                                            |
|                             | Prevalence<br>N (%)                    | Entrance to paid<br>employment<br>HR (95% CI) <sup>1</sup> | Prevalence<br>N (%)                                             | Entrance to paid<br>employment<br>HR (95% CI) <sup>1</sup> | Prevalence<br>N (%)                    | Entrance to paid<br>employment<br>HR (95% CI) <sup>1</sup> | Prevalence<br>N (%)                                             | Entrance to paid<br>employment<br>HR (95% CI) <sup>1</sup> |
| <b>Sex</b>                  |                                        |                                                            |                                                                 |                                                            |                                        |                                                            |                                                                 |                                                            |
| - Female                    | 8 196 (1.7)                            | 0.76 (0.74-0.78)                                           | 6 404 (1.6)                                                     | 1.23 (1.18-1.28)                                           | 382 (0.1)                              | 0.83 (0.75-0.93)                                           | 328 (0.1)                                                       | 1.20 (0.99-1.46)                                           |
| - Male                      | 16 475 (3.1)                           | 0.79 (0.78-0.81)                                           | 13 716 (3.0)                                                    | 1.42 (1.37-1.46)                                           | 384 (0.1)                              | 0.78 (0.70-0.86)                                           | 349 (0.1)                                                       | 2.08 (1.76-2.47)                                           |
| - Transgender               | 27 (4.2)                               | 0.82 (0.52-1.30)                                           | 19 (4.1)                                                        | 1.22 (0.62-2.41)                                           | x                                      | 0.60 (0.15-2.40)                                           | x                                                               | -                                                          |
| <b>Migration background</b> |                                        |                                                            |                                                                 |                                                            |                                        |                                                            |                                                                 |                                                            |
| - Native Dutch              | 21 983 (3.0)                           | 0.78 (0.76-0.79)                                           | 18 155 (2.7)                                                    | 1.42 (1.38-1.46)                                           | 600 (0.1)                              | 0.79 (0.73-0.86)                                           | 540 (0.1)                                                       | 1.79 (1.54-2.07)                                           |
| - Moroccan                  | 262 (0.7)                              | 0.66 (0.56-0.78)                                           | 153 (0.5)                                                       | 1.27 (1.03-1.57)                                           | 15 (0.0)                               | 0.60 (0.33-1.09)                                           | 11 (0.0)                                                        | 0.63 (0.16-2.53)                                           |
| - Turkish                   | 239 (0.5)                              | 0.77 (0.66-0.89)                                           | 171 (0.5)                                                       | 1.17 (0.94-1.44)                                           | 27 (0.1)                               | 0.90 (0.59-1.37)                                           | 22 (0.1)                                                        | 1.16 (0.64-2.09)                                           |
| - Antillean                 | 506 (1.0)                              | 0.80 (0.71-0.89)                                           | 331 (0.9)                                                       | 1.00 (0.85-1.18)                                           | 33 (0.1)                               | 0.87 (0.60-1.27)                                           | 28 (0.1)                                                        | 1.36 (0.80-2.29)                                           |
| - Other European            | 605 (2.4)                              | 0.85 (0.78-0.93)                                           | 485 (2.2)                                                       | 1.30 (1.12-1.49)                                           | 24 (0.1)                               | 0.56 (0.36-0.88)                                           | 19 (0.1)                                                        | 1.34 (0.64-2.82)                                           |
| - Other non-European        | 1 103 (1.1)                            | 1.00 (0.94-1.07)                                           | 844 (1.1)                                                       | 0.98 (0.88-1.09)                                           | 70 (0.1)                               | 1.14 (0.88-1.47)                                           | 59 (0.1)                                                        | 1.07 (0.71-1.62)                                           |

<sup>1</sup> Adjusted for sociodemographics (age at graduation, sex, migration background)

<sup>x</sup> Number of individuals below 10 were not showed in the table due to the risk of disclosure

Table S3. Associations of medication use for mental disorders with entering paid employment among all higher education graduates (N = 1 341 998), and with exiting paid employment among higher education graduates (N = 969 885) who entered to paid employment, stratified by sex and migration background.

|                      | Higher education <sup>1</sup>          |                                                            |                                                                 |                                                            |                                        |                                                            |                                                                 |                                                            |
|----------------------|----------------------------------------|------------------------------------------------------------|-----------------------------------------------------------------|------------------------------------------------------------|----------------------------------------|------------------------------------------------------------|-----------------------------------------------------------------|------------------------------------------------------------|
|                      | Antipsychotics                         |                                                            |                                                                 |                                                            | Anxiolytics                            |                                                            |                                                                 |                                                            |
|                      | Among all graduates<br>(N = 1 341 998) |                                                            | Among graduates who entered<br>paid employment<br>(N = 969 885) |                                                            | Among all graduates<br>(N = 1 341 998) |                                                            | Among graduates who entered<br>paid employment<br>(N = 969 885) |                                                            |
|                      | Prevalence<br>N (%)                    | Entrance to paid<br>employment<br>HR (95% CI) <sup>1</sup> | Prevalence<br>N (%)                                             | Exit from paid<br>employment<br>HR (95% CI) <sup>1</sup>   | Prevalence<br>N (%)                    | Entrance to paid<br>employment<br>HR (95% CI) <sup>1</sup> | Prevalence<br>N (%)                                             | Entrance to paid<br>employment<br>HR (95% CI) <sup>1</sup> |
| Sex                  |                                        |                                                            |                                                                 |                                                            |                                        |                                                            |                                                                 |                                                            |
| - Female             | 2 707 (0.4)                            | 0.45 (0.43-0.47)                                           | 1 682 (0.3)                                                     | 1.80 (1.66-1.95)                                           | 3 530 (0.5)                            | 0.66 (0.64-0.69)                                           | 2 565 (0.5)                                                     | 1.35 (1.26-1.44)                                           |
| - Male               | 1 878 (0.3)                            | 0.42 (0.39-0.44)                                           | 1 164 (0.3)                                                     | 1.86 (1.69-2.05)                                           | 1 581 (0.3)                            | 0.64 (0.60-0.67)                                           | 1 146 (0.3)                                                     | 1.48 (1.34-1.64)                                           |
| - Transgender        | 21 (3.4)                               | 0.69 (0.39-1.24)                                           | 12 (3.6)                                                        | 1.37 (0.53-3.49)                                           | x                                      | 2.23 (0.98-5.07)                                           | x                                                               | 1.30 (0.18-9.39)                                           |
| Migration background |                                        |                                                            |                                                                 |                                                            |                                        |                                                            |                                                                 |                                                            |
| - Native Dutch       | 3 590 (0.4)                            | 0.41 (0.40-0.43)                                           | 2253 (0.3)                                                      | 1.92 (1.79-2.06)                                           | 3 814 (0.4)                            | 0.61 (0.59-0.63)                                           | 2 808 (0.4)                                                     | 1.46 (1.37-1.56)                                           |
| - Moroccan           | 71 (0.3)                               | 0.38 (0.28-0.50)                                           | 50 (0.3)                                                        | 1.20 (0.74-1.97)                                           | 123 (0.5)                              | 0.70 (0.58-0.86)                                           | 98 (0.5)                                                        | 1.36 (0.98-1.89)                                           |
| - Turkish            | 80 (0.3)                               | 0.44 (0.33-0.59)                                           | 48 (0.2)                                                        | 1.40 (0.88-2.22)                                           | 157 (0.6)                              | 0.75 (0.63-0.90)                                           | 118 (0.6)                                                       | 1.78 (1.38-2.30)                                           |
| - Antillean          | 140 (0.4)                              | 0.41 (0.33-0.51)                                           | 77 (0.3)                                                        | 1.23 (0.84-1.80)                                           | 225 (0.6)                              | 0.64 (0.55-0.75)                                           | 153 (0.5)                                                       | 1.06 (0.81-1.40)                                           |
| - Other European     | 186 (0.4)                              | 0.45 (0.37-0.55)                                           | 110 (0.3)                                                       | 1.24 (0.85-1.81)                                           | 205 (0.5)                              | 0.67 (0.56-0.79)                                           | 138 (0.5)                                                       | 1.33 (1.01-1.74)                                           |
| - Other non-European | 539 (0.2)                              | 0.76 (0.68-0.85)                                           | 320 (0.3)                                                       | 1.52 (1.12-2.06)                                           | 593 (0.3)                              | 1.11 (1.01-1.23)                                           | 402 (0.3)                                                       | 1.09 (0.92-1.29)                                           |
|                      | Hypnotics & sedatives                  |                                                            |                                                                 |                                                            | Antidepressants                        |                                                            |                                                                 |                                                            |
|                      | Among all graduates<br>(N = 1 341 998) |                                                            | Among graduates who entered<br>paid employment<br>(N = 969 885) |                                                            | Among all graduates<br>(N = 1 341 998) |                                                            | Among graduates who entered<br>paid employment<br>(N = 969 885) |                                                            |
|                      | Prevalence<br>N (%)                    | Entrance to paid<br>employment<br>HR (95% CI) <sup>1</sup> | Prevalence<br>N (%)                                             | Entrance to paid<br>employment<br>HR (95% CI) <sup>1</sup> | Prevalence<br>N (%)                    | Entrance to paid<br>employment<br>HR (95% CI) <sup>1</sup> | Prevalence<br>N (%)                                             | Entrance to paid<br>employment<br>HR (95% CI) <sup>1</sup> |
| Sex                  |                                        |                                                            |                                                                 |                                                            |                                        |                                                            |                                                                 |                                                            |
| - Female             | 1 493 (0.2)                            | 0.55 (0.51-0.58)                                           | 1 016 (0.2)                                                     | 1.52 (1.37-1.70)                                           | 17 910 (2.4)                           | 0.72 (0.70-0.73)                                           | 13 466 (2.5)                                                    | 1.39 (1.35-1.44)                                           |
| - Male               | 727 (0.1)                              | 0.52 (0.48-0.57)                                           | 469 (0.1)                                                       | 1.47 (1.24-1.75)                                           | 7 327 (1.2)                            | 0.69 (0.67-0.71)                                           | 5 515 (1.3)                                                     | 1.46 (1.39-1.53)                                           |
| - Transgender        | x                                      | 0.51 (0.19-1.37)                                           | x                                                               | 1.55 (0.21-11.23)                                          | 54 (8.8)                               | 0.60 (0.39-0.91)                                           | 25 (7.4)                                                        | 2.15 (1.16-3.97)                                           |
| Migration background |                                        |                                                            |                                                                 |                                                            |                                        |                                                            |                                                                 |                                                            |
| - Native Dutch       | 1 670 (0.2)                            | 0.51 (0.48-0.54)                                           | 1 130 (0.1)                                                     | 1.58 (1.42-1.75)                                           | 20 639 (2.1)                           | 0.67 (0.66-0.68)                                           | 15 720 (2.1)                                                    | 1.45 (1.41-1.49)                                           |
| - Moroccan           | 52 (0.2)                               | 0.41 (0.29-0.57)                                           | 34 (0.2)                                                        | 1.26 (0.70-2.28)                                           | 367 (1.6)                              | 0.53 (0.47-0.60)                                           | 263 (1.4)                                                       | 1.31 (1.08-1.60)                                           |
| - Turkish            | 72 (0.3)                               | 0.53 (0.40-0.71)                                           | 46 (0.2)                                                        | 1.60 (1.01-2.54)                                           | 440 (1.7)                              | 0.66 (0.59-0.74)                                           | 312 (1.6)                                                       | 1.40 (1.17-1.67)                                           |
| - Antillean          | 104 (0.3)                              | 0.51 (0.40-0.65)                                           | 66 (0.2)                                                        | 1.28 (0.84-1.95)                                           | 590 (1.5)                              | 0.72 (0.65-0.79)                                           | 432 (1.5)                                                       | 1.28 (1.09-1.49)                                           |
| - Other European     | 98 (0.2)                               | 0.62 (0.48-0.78)                                           | 66 (0.2)                                                        | 1.71 (1.18-2.48)                                           | 866 (2.1)                              | 0.81 (0.75-0.88)                                           | 612 (2.2)                                                       | 1.30 (1.14-1.49)                                           |
| - Other non-European | 231 (0.1)                              | 0.93 (0.79-1.09)                                           | 147 (0.1)                                                       | 1.19 (0.89-1.61)                                           | 2 389 (1.1)                            | 1.16 (1.10-1.22)                                           | 1667 (1.4)                                                      | 1.31 (1.21-1.42)                                           |
|                      | Psychostimulants                       |                                                            |                                                                 |                                                            | Drugs for addiction                    |                                                            |                                                                 |                                                            |
|                      | Among all graduates<br>(N = 1 341 998) |                                                            | Among graduates who entered<br>paid employment<br>(N = 969 885) |                                                            | Among all graduates<br>(N = 1 341 998) |                                                            | Among graduates who entered<br>paid employment<br>(N = 969 885) |                                                            |
|                      | Prevalence<br>N (%)                    | Entrance to paid<br>employment<br>HR (95% CI) <sup>1</sup> | Prevalence<br>N (%)                                             | Entrance to paid<br>employment<br>HR (95% CI) <sup>1</sup> | Prevalence<br>N (%)                    | Entrance to paid<br>employment<br>HR (95% CI) <sup>1</sup> | Prevalence<br>N (%)                                             | Entrance to paid<br>employment<br>HR (95% CI) <sup>1</sup> |
| Sex                  |                                        |                                                            |                                                                 |                                                            |                                        |                                                            |                                                                 |                                                            |
| - Female             | 11 212 (1.5)                           | 0.67 (0.66-0.69)                                           | 7 172 (1.3)                                                     | 1.38 (1.32-1.44)                                           | 236 (0.0)                              | 0.77 (0.66-0.88)                                           | 193 (0.0)                                                       | 1.39 (1.08-1.80)                                           |
| - Male               | 12 418 (2.1)                           | 0.69 (0.67-0.70)                                           | 7 876 (1.8)                                                     | 1.42 (1.36-1.49)                                           | 200 (0.0)                              | 0.79 (0.67-0.92)                                           | 152 (0.0)                                                       | 1.66 (1.24-2.23)                                           |
| - Transgender        | 30 (4.9)                               | 0.83 (0.49-1.39)                                           | 15 (4.5)                                                        | 0.91 (0.37-2.22)                                           | x                                      | 10.02 (2.46-40.90)                                         | x                                                               | 1.25 (0.17-9.00)                                           |
| Migration background |                                        |                                                            |                                                                 |                                                            |                                        |                                                            |                                                                 |                                                            |
| - Native Dutch       | 19 876 (2.0)                           | 0.65 (0.64-0.66)                                           | 12 716 (1.7)                                                    | 1.45 (1.41-1.50)                                           | 328 (0.0)                              | 0.72 (0.64-0.81)                                           | 263 (0.0)                                                       | 1.63 (1.29-2.05)                                           |
| - Moroccan           | 201 (0.9)                              | 0.69 (0.58-0.82)                                           | 132 (0.7)                                                       | 1.22 (0.90-1.65)                                           | x                                      | 1.03 (0.49-2.16)                                           | x                                                               | 2.94 (1.10-7.84)                                           |
| - Turkish            | 246 (1.0)                              | 0.70 (0.59-0.81)                                           | 155 (0.8)                                                       | 1.09 (0.81-1.48)                                           | 13 (0.1)                               | 0.83 (0.45-1.55)                                           | 10 (0.1)                                                        | 0.78 (0.25-2.43)                                           |
| - Antillean          | 495 (1.3)                              | 0.71 (0.64-0.80)                                           | 309 (1.0)                                                       | 1.02 (0.82-1.26)                                           | 11 (0.0)                               | 0.79 (0.40-1.58)                                           | x                                                               | 1.37 (0.44-4.25)                                           |
| - Other European     | 810 (1.9)                              | 0.80 (0.73-0.88)                                           | 503 (1.8)                                                       | 1.14 (0.97-1.35)                                           | 17 (0.0)                               | 0.55 (0.30-0.99)                                           | 11 (0.0)                                                        | 2.37 (1.06-5.28)                                           |
| - Other non-European | 2 032 (0.9)                            | 1.12 (1.06-1.18)                                           | 1248 (1.1)                                                      | 1.29 (1.17-1.42)                                           | 62 (0.0)                               | 1.40 (1.05-1.85)                                           | 48 (0.0)                                                        | 1.01 (0.60-1.70)                                           |

<sup>1</sup> Adjusted for sociodemographics (age at graduation, sex, migration background)

<sup>x</sup> Number of individuals below 10 were not showed in the table due to the risk of disclosure
